# Supplementary material for: Sterol Biosynthesis Is Required for Heat Resistance but Not Extracellular Survival in Leishmania
Source: PubMed Central journal article supplement (PMC4207814; doi:10.1371/journal.ppat.1004427), 2014-10-23
Supplement: ppat.1004427.s002.pdf [file ppat.1004427.s002.pdf]

Potential signal peptide

|     |                                                                   |                        |
|-----|-------------------------------------------------------------------|------------------------|
| 1   | -----MI GEFLLTAGLALYGWYFCKSFNTTR-----PT                           | <i>L. major</i>        |
| 1   | MLLLGLLQAGGSVLGQAMEKVTGGNLLSMLL-IACAFTLSLVYLIRLAAGHLVQLPAGVK      | <i>H. sapiens</i>      |
| 1   | -----MVPMLWLTAYMAVAVLT--AILLNWVYQLFFRLWN-----RT                   | <i>A. fumigatus</i>    |
| 1   | MAI VETVI DG-----I NYFLSLSVTQQI SILLGVPFVYNLVWQYLSLR-----KD       | <i>C. albicans</i>     |
| 1   | -----MS-----AV                                                    | <i>M. tuberculosis</i> |
| 31  | DPPVHVCAMPFVGHIIQFGKDPLDFMLNAKKKYGVFTMNICGNRVTVVGDVHQHNKFFT       | <i>L. major</i>        |
| 60  | SPPYIFSPI PFLGHAI AFGKSPI EFL ENAYEKY GPVFSFTMVGKFTYLLGSDAAAL LFN | <i>H. sapiens</i>      |
| 36  | EPPMVFHWVPYLGSTISYGI DPYKFFFACREKYGDIFTFILLGQKTTVYLGVOGNEFLN      | <i>A. fumigatus</i>    |
| 47  | RAPLVFYWPWFGSAASYGQPPYEFFESCROKYGDVFSFLLGKIMTVYLGPKGHEFVFN        | <i>C. albicans</i>     |
| 5   | ALPRVSGGHDEHGHLEEFRTDPIGLMQRVRDECGDVCTFOLAGKQVVL LSGSHANEF FFR    | <i>M. tuberculosis</i> |
|     | *****                                                             |                        |
| 91  | PRNEILSPREVYS-FMVPVFGEGVAYAAPYPMRREQLNFLAEELTVAKFQNFAPSI QHEV     | <i>L. major</i>        |
| 120 | SKNEDLNAEDVYSRLTTPVFGKGVAYDVPNPVFL EQKMLKSGLNI AHFKQHSII EKET     | <i>H. sapiens</i>      |
| 96  | GKLDVNAEEVYSPLTTPVFGSDVYDQPNKLMEOKKFKYGLTQSALESHVPLI EKEV         | <i>A. fumigatus</i>    |
| 10< | AKLSDVSAEDAYKHLTTPVFGKGVLYDCPN SRLMEQKFAKFAITDTSFKRYVPI REEI      | <i>C. albicans</i>     |
| 65  | AGDDDLQAQKAYP-FMTPIFGEGVVFDA SPERRKE--MLHNAALRGEQMKGHAATI EDQV    | <i>M. tuberculosis</i> |
| 150 | RKFMKANVN-----KDEGEINLDDCSAMIINTACOCLFGEDLRKRLDARQFAQLLAKME       | <i>L. major</i>        |
| 180 | KEYFES-----WGEGEKNVFEALSELIILTASHCLFGKEIRSQLNE-KVAQLYADLD         | <i>H. sapiens</i>      |
| 156 | LDYLRDSPNFQ--GSSGRVDISAAMAEITIFAARALOGCEVRSKLI AEFADLYHOLD        | <i>A. fumigatus</i>    |
| 16< | LNYFVTDESFKLKEKTHGVANVMKTQPEITIFTASRSLFGDEMRRIFDR-SFAQLYSDLD      | <i>C. albicans</i>     |
| 122 | RRMIAD-----WGEAGEIDLLDFFAELTIYTSACLIGKKFRDQLDG-RFAKLYHELE         | <i>M. tuberculosis</i> |
| 205 | SCLIPAAVFLPM LKLPLQSYRCRDARAELODILSEI IAREKEEAQKDSNTS DLLASL      | <i>L. major</i>        |
| 232 | GGFSHAAWLPG--WLPLPSFRRDRAHREIKDIFYKAIQKR-RQSCEK--IDDI LQTL        | <i>H. sapiens</i>      |
| 212 | KGFTPI NFMLP--WAPLPHNKKRDAAHARMRSIYVDIITQR-RLDGEKDSQKSDMI WNL     | <i>A. fumigatus</i>    |
| 226 | KGFTPI NFVFP--NLPLPHYWRRDAAQKKI SATYMKELKLR-RERGDIDPINDLI DSSL    | <i>C. albicans</i>     |
| 174 | RGTDPLAYVDP--YLPISFRRRDEARNGLVALVADI MNGR-I ANPPTDKSDRDMLDVL      | <i>M. tuberculosis</i> |
| 265 | LGAHYRDGT-RMSQHEVCGMVAAMFAGQHTSTITITWSLLHLMOPRNKRHLAKLHQEID       | <i>L. major</i>        |
| 286 | LDATYKDGR-PLTDDEVAGMLIGL LLAGQHTSSITSAWMGFFLA--RDKITLQKKCYLEQK    | <i>H. sapiens</i>      |
| 268 | MNCTYKNGQ-QVPDKIEAHMMITLLMAGQHSSTISAWMLRLA-SQPKVLEELYQEQL         | <i>A. fumigatus</i>    |
| 282 | IHSTYKDGV-KMTDQEI ANLLIGLIMGQHTSASTSAWFLHLG--EKPHLQDVI YQEVV      | <i>C. albicans</i>     |
| 230 | I AVKAETGT PRFSADEITGMFISMMFAGHTSSCTASWTLIELM--RHRDAYAAVIDELD     | <i>M. tuberculosis</i> |
| 324 | EFPACL N-----YDNVMEEMPFAEQCARESI RRDPLI MLMRKVL KPVOVGK--CVV      | <i>L. major</i>        |
| 343 | TVCGN-----LPPLTYDCLKDLNLLDRCIKETLRLRPPI MIMRMARTPQTVA G-YTI       | <i>H. sapiens</i>      |
| 325 | ANLGAQPDGSLPPLQYKDLDKLPFHQHVIRETLRIHSSI HSI MRKVKSPLPVPGTPYM      | <i>A. fumigatus</i>    |
| 339 | ELLKEKG--GDLNDTYEDLOKLPVNNITIKETLRMHMPLHSIFRKVTNPLRI PETNYI V     | <i>C. albicans</i>     |
| 288 | ELYGDGR-----S-VSFHALRQIPOLENVLKETLRLHPLI ILMRVAKGEFEVQG--HRI      | <i>M. tuberculosis</i> |
| 374 | PEGDI IACSPLLSHQDEEAFNPREWNPERNMKL-----V                          | <i>L. major</i>        |
| 396 | PPGHQVCVSPITVNRQLKDSWERLDFNPDQRYLQD-----NP-----ASGE               | <i>H. sapiens</i>      |
| 385 | PPGRVLLASPGVITALSDEHFPNAGCWDPHRVENQATKEQ---ENDKVVDYGYGAVSKGT      | <i>A. fumigatus</i>    |
| 397 | PKGHYVLSVPGYAHTSERYFDNPEDFDPTIRWDTAAAKANSVSFNS SDEVYGFVKVSKGV     | <i>C. albicans</i>     |
| 340 | HEGDLVAASPAISNRI PEDFPDPHFVDPARYEQP--RQE-----D-----LLN            | <i>M. tuberculosis</i> |
| 409 | DGAFQGFAGVMHKCI GEKFGLLQVKTVLATVLRDQDFEL LG-P--LPEPNYHTMVVGPTA    | <i>L. major</i>        |
| 436 | KFAYVPPFAGRHRICI GENFAYVQIKTIVSTMLRLYEFDLIDGY--FPTVNYITMI HTPEN   | <i>H. sapiens</i>      |
| 441 | SSPYLPFGAGRHRICI GEKFAVYVNLGVLATI VRHLRLFNVDGKKGVPETIDYSSL FSGPMK | <i>A. fumigatus</i>    |
| 457 | SSPYLPFGAGRHRICI GEQFAYVQLGTI LITTFVYNLR-WTIDGYK-VDPDPYSSMVVLPTE  | <i>C. albicans</i>     |
| 381 | RWTW PFGAGRHRICVCAAFAI MQIKALFVLLREYEFEMAQPPPE-SYRNDHSMKIMVQLAQ   | <i>M. tuberculosis</i> |
| 466 | SQCRVKYI RKKAAA                                                   | <i>L. major</i>        |
| 494 | P-VIRYKRRSK                                                       | <i>H. sapiens</i>      |
| 501 | PSIIGWEKRSKNTSK                                                   | <i>A. fumigatus</i>    |
| 515 | PAEII WEKRETCMF                                                   | <i>C. albicans</i>     |
| 440 | PACVRYRRRTGV                                                      | <i>M. tuberculosis</i> |
