# Supplementary material for: Sterol Biosynthesis Is Required for Heat Resistance but Not Extracellular Survival in Leishmania
Source: PubMed Central journal article supplement (PMC4207814; doi:10.1371/journal.ppat.1004427), 2014-10-23
Supplement: ppat.1004427.s006.pdf [file ppat.1004427.s006.pdf]

A

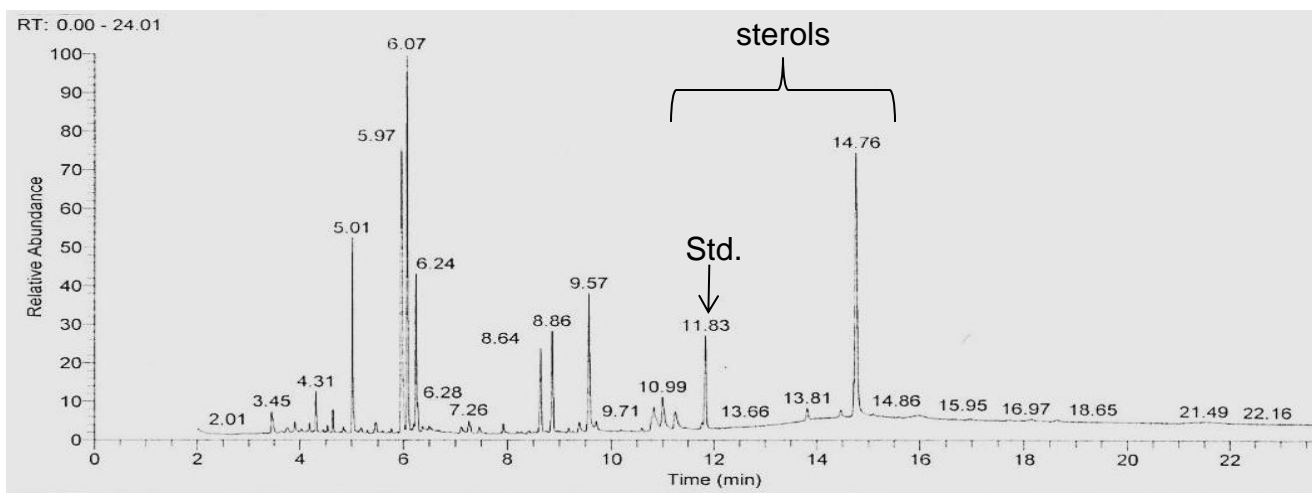

8.6E8

B

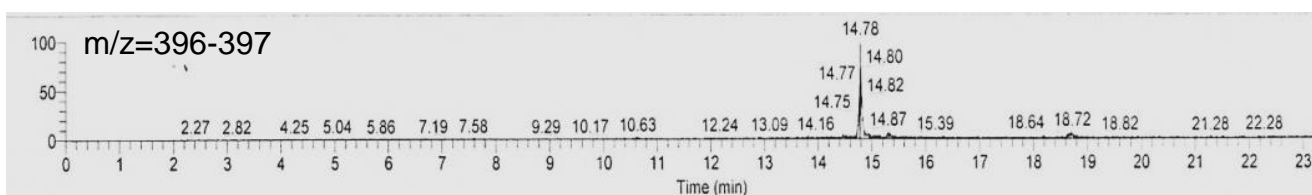

1.7E5

C

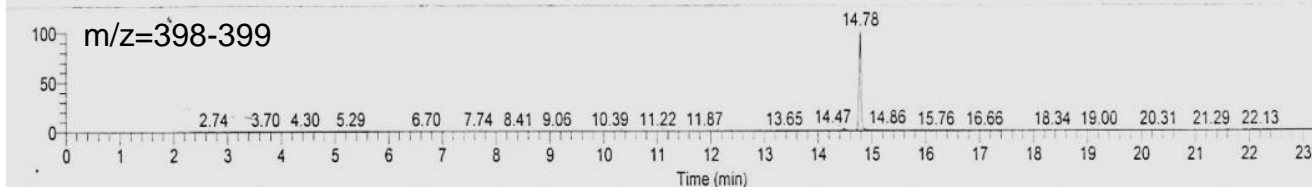

3.8E6

D

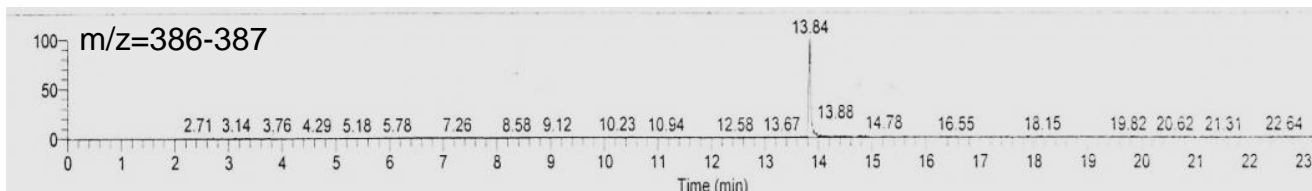

2.6E5

E

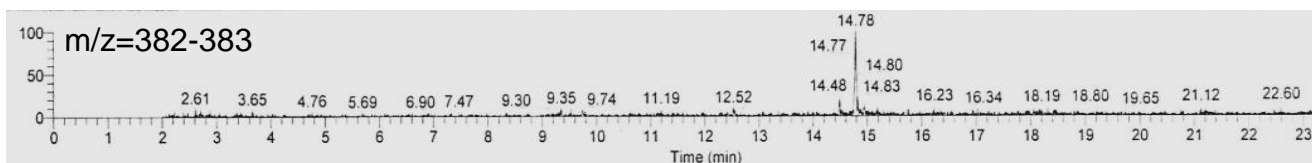

3.2E4

F

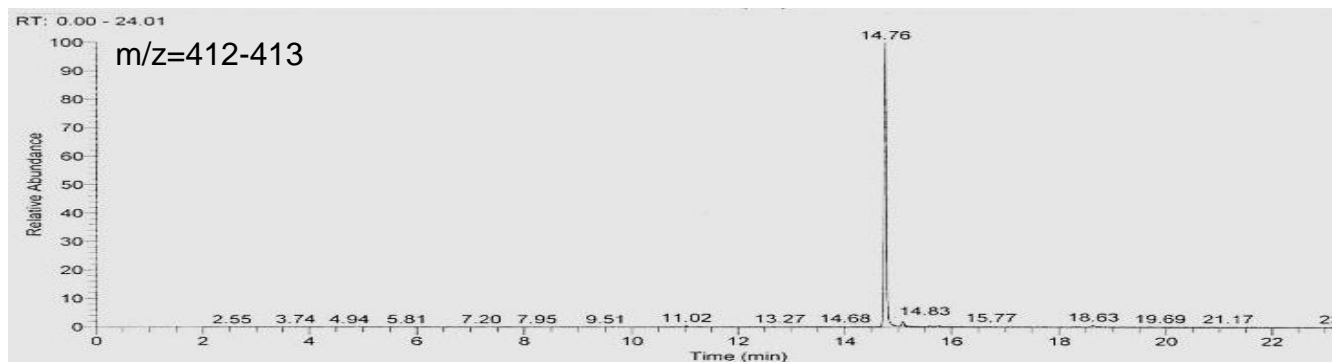

6.3E6
