# Supplementary material for: Sterol Biosynthesis Is Required for Heat Resistance but Not Extracellular Survival in Leishmania
Source: PubMed Central journal article supplement (PMC4207814; doi:10.1371/journal.ppat.1004427), 2014-10-23
Supplement: ppat.1004427.s008.pdf [file ppat.1004427.s008.pdf]

**A**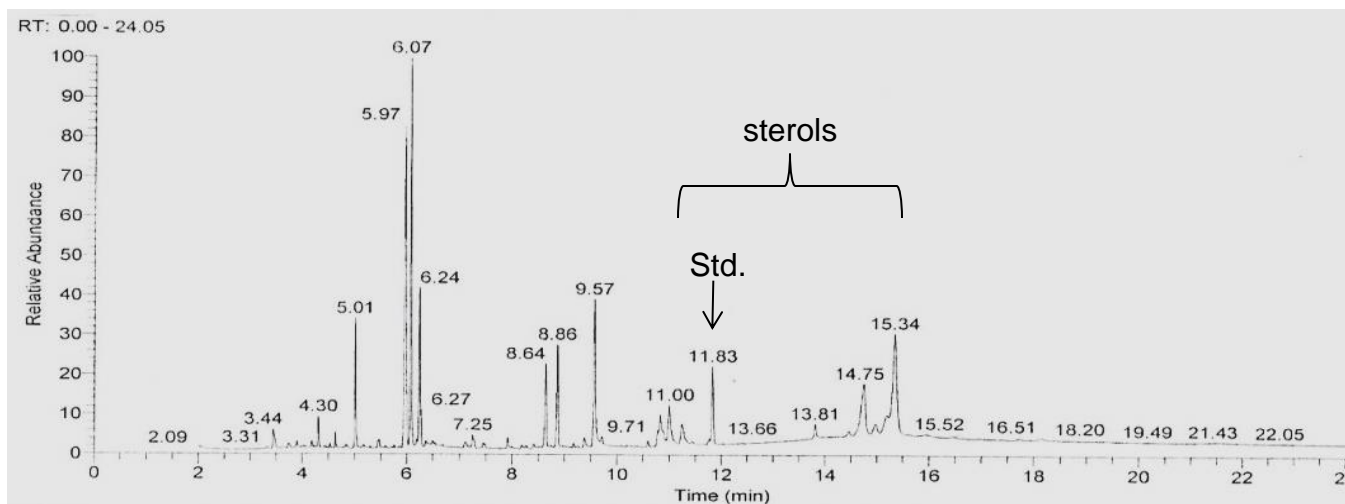

1.2E9

**B**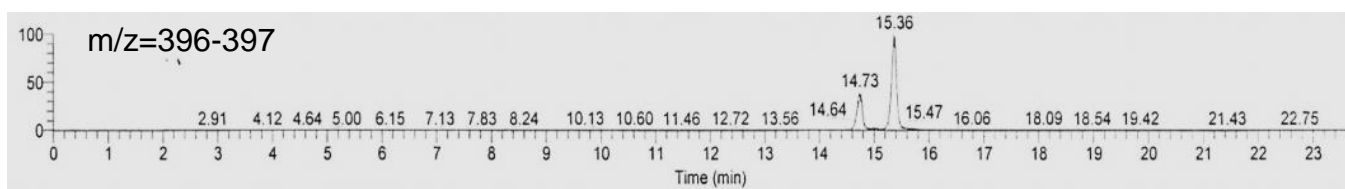

1.4E6

**C**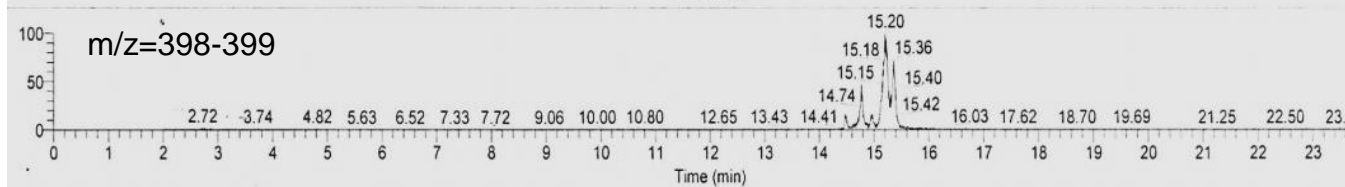

2.6E5

**D**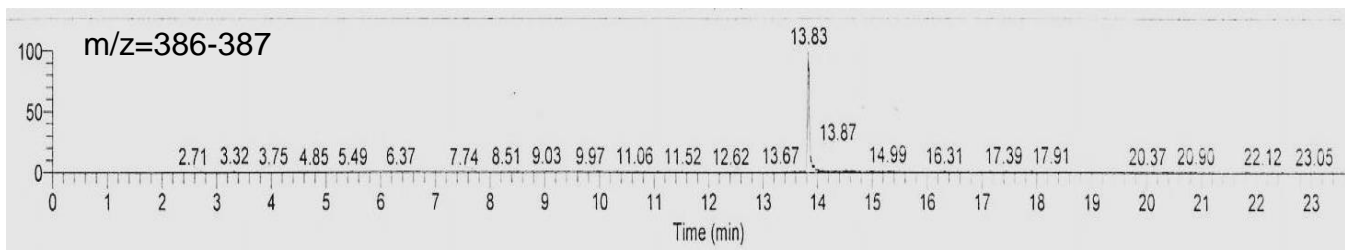

3.2E5

**E**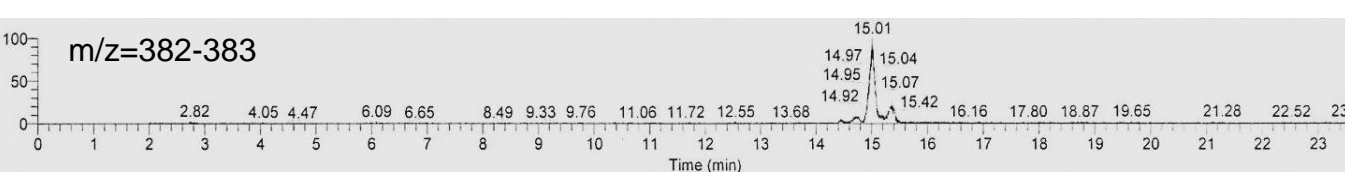

1.6E5

**F**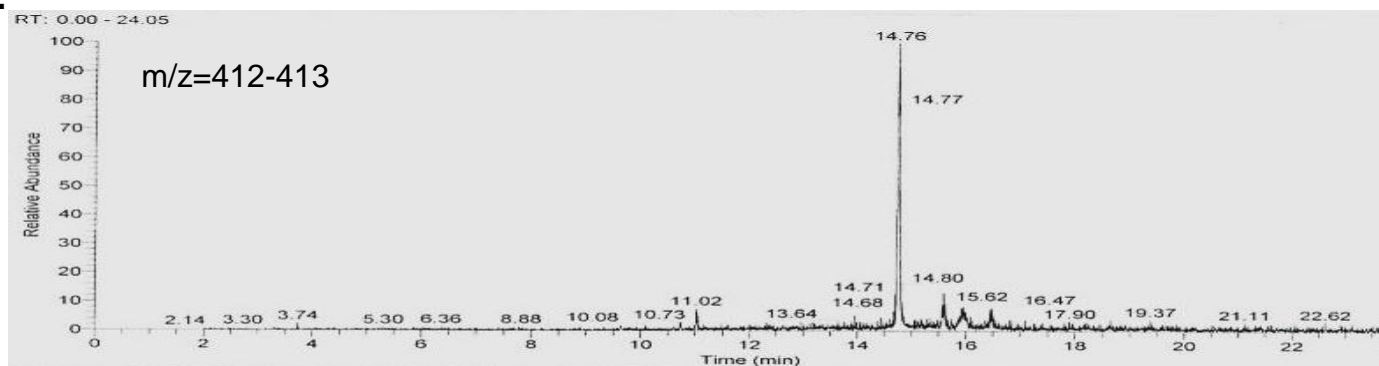

5.9E5
