# Supplementary material for: Sterol Biosynthesis Is Required for Heat Resistance but Not Extracellular Survival in Leishmania
Source: PubMed Central journal article supplement (PMC4207814; doi:10.1371/journal.ppat.1004427), 2014-10-23

14-Methyl fecosterol (412.6) +14-Methyl zymosterol (398.6)

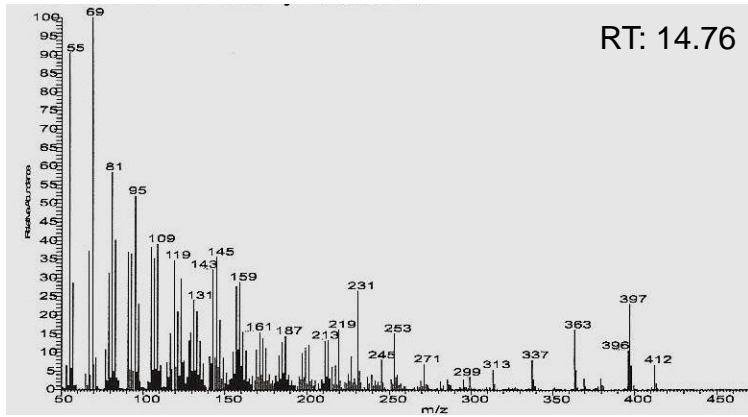

Ergosterol (396.6)

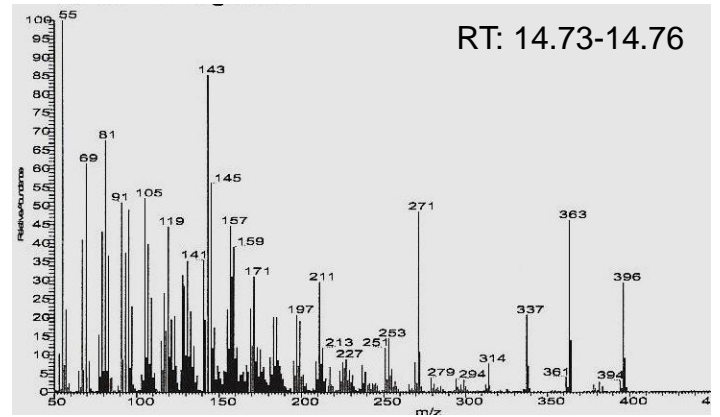

Cholesta-3,5-diene (368.7)

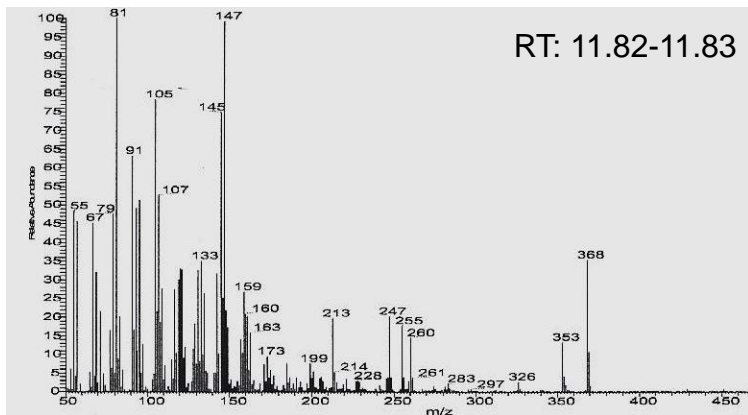

Episterol (398.6)

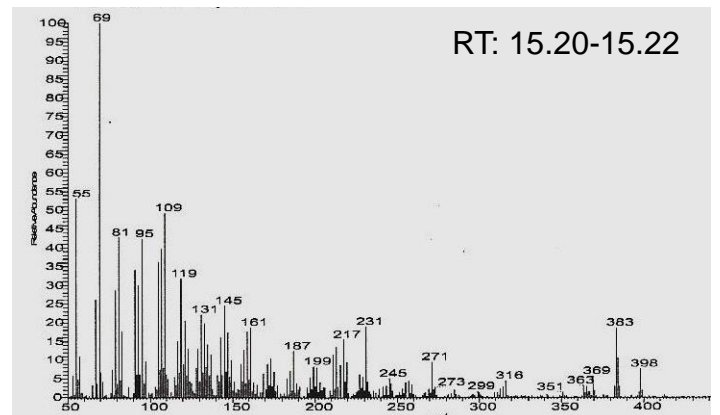

5-Dehydroepisterol (396.6)

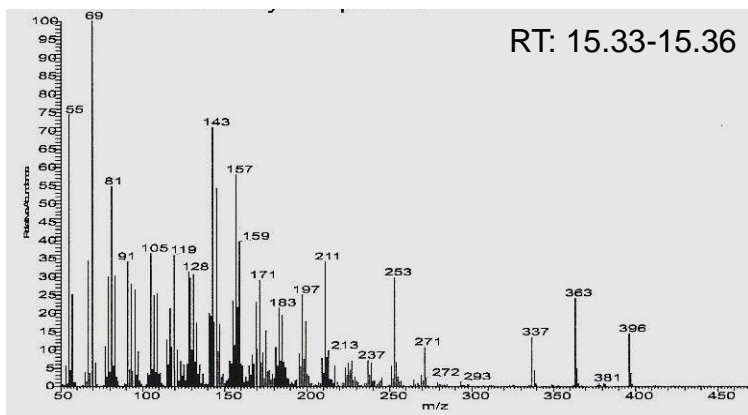

Cholesterol (386.6)

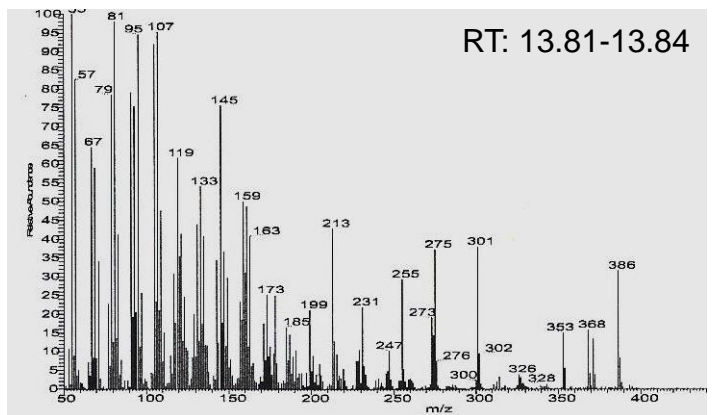

Cholesta-5,7,24-trienol (382.6)

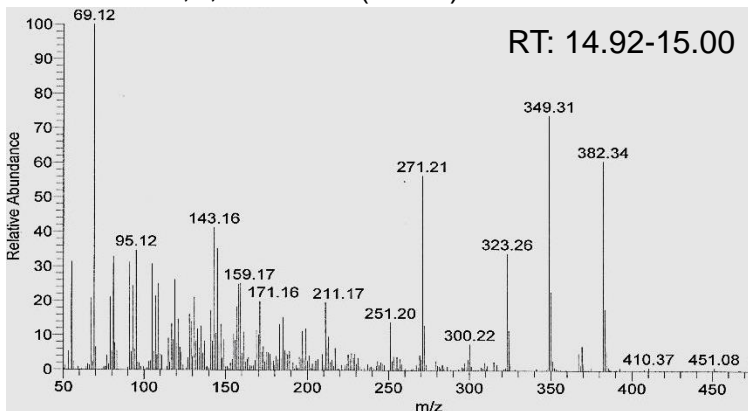

Supplement: ppat.1004427.s009.pdf [file ppat.1004427.s009.pdf]
