# Supplementary material for: Sterol Biosynthesis Is Required for Heat Resistance but Not Extracellular Survival in Leishmania
Source: PubMed Central journal article supplement (PMC4207814; doi:10.1371/journal.ppat.1004427), 2014-10-23

**A**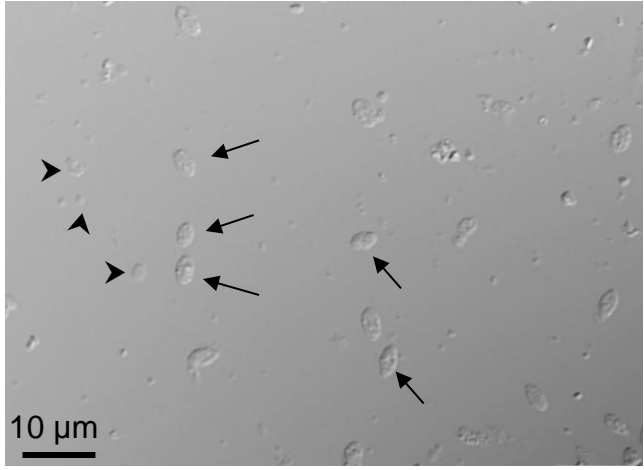**B**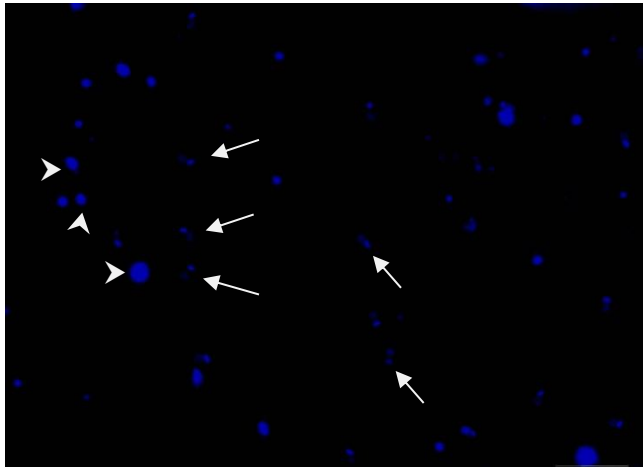**C**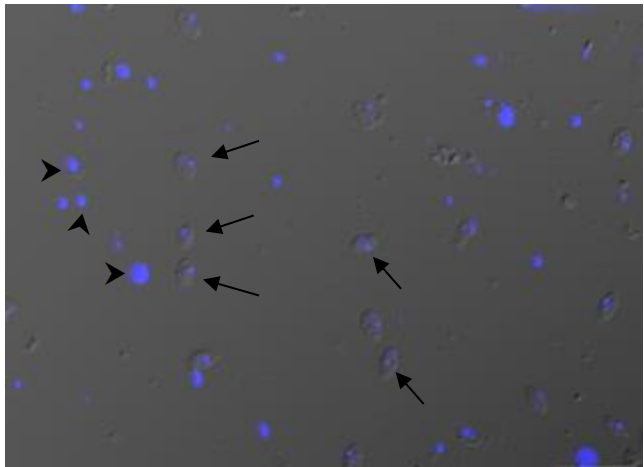

Supplement: ppat.1004427.s013.pdf [file ppat.1004427.s013.pdf]
