# Supplementary material for: Sterol Biosynthesis Is Required for Heat Resistance but Not Extracellular Survival in Leishmania
Source: PubMed Central journal article supplement (PMC4207814; doi:10.1371/journal.ppat.1004427), 2014-10-23
Supplement: ppat.1004427.s021.pdf [file ppat.1004427.s021.pdf]

**Table S1. Sterol composition in *Leishmania* promastigotes**

|                                 | Ergosterol | 5-Dehydro-episterol | Cholesterol | Cholesta-5,7,24-trienol | 14-Methyl sterols | Total   |
|---------------------------------|------------|---------------------|-------------|-------------------------|-------------------|---------|
| <i>L. major</i>                 | 1.1±0.2    | 2.2±0.3             | 0.17±0.02   | 0.43±0.02               | ND                | 3.9±0.5 |
| <i>L. major</i> +ITZ            | ND         | ND                  | 0.19±0.07   | ND                      | 4.0±0.4           | 4.2±0.5 |
| <i>c14dm<sup>-</sup></i>        | ND         | ND                  | 0.14±0.04   | ND                      | 3.8±0.3           | 3.9±0.4 |
| <i>c14dm<sup>-</sup></i> +C14DM | 1.0±0.3    | 2.1±0.2             | 0.20±0.01   | 0.24±0.04               | ND                | 3.6±0.5 |
| <i>L. donovani</i>              | 0.9±0.3    | 2.0±0.5             | 0.21±0.04   | 1.3±0.13                | ND                | 4.4±0.9 |
| <i>L. donovani</i> +ITZ         | ND         | ND                  | 0.24±0.06   | ND                      | 4.0±0.3           | 4.3±0.4 |
| <i>L. mexicana</i>              | 0.26±0.11  | 4.0±0.2             | 0.20±0.04   | 0.29±0.17               | ND                | 4.7±0.6 |
| <i>L. mexicana</i> +ITZ         | ND         | ND                  | 0.15±0.01   | ND                      | 3.0±0.6           | 3.2±0.6 |
| <i>L. amazonensis</i>           | 0.32±0.1   | 3.8±0.2             | 0.17±0.02   | 1.1±0.5                 | ND                | 5.4±0.8 |
| <i>L. amazonensis</i> +ITZ      | ND         | ND                  | 0.18±0.03   | ND                      | 4.1±0.2           | 4.3±0.3 |

Promastigotes were cultured in the absence or presence of ITZ (provided at IC25 concentrations: 120 nM for *L. major*, 81 nM for *L. donovani*, 3.3 nM for *L. mexicana*, and 25 nM for *L. amazonensis*) from early log phase to day 1 stationary phase and total lipids were analyzed by GC-MS. Abundances of ergosterol, 5-dehydroepisterol, cholesterol, cholesta-5,7,24-trienol, 14-methyl sterols (14-methylfecosterol + 14-methylzymosterol), and total sterols were estimated in relation to the internal standard cholesta-3,5-diene (provided at  $2.0 \times 10^7$  molecules/cell). Analyses were repeated 3 times and averaged values  $\pm$  standard deviations (SDs) were shown. ND: not detectable.
