# Supplementary material for: Sterol Biosynthesis Is Required for Heat Resistance but Not Extracellular Survival in Leishmania
Source: PubMed Central journal article supplement (PMC4207814; doi:10.1371/journal.ppat.1004427), 2014-10-23
Supplement: ppat.1004427.s022.pdf [file ppat.1004427.s022.pdf]

**Table S2. Susceptibility of *Leishmania* parasites to ITZ (IC values in  $\mu\text{M}$ )**

|                       | IC25               | IC50             | IC90           |
|-----------------------|--------------------|------------------|----------------|
| <i>L. major</i>       | 0.12 $\pm$ 0.10    | 0.40 $\pm$ 0.10  | 10.0 $\pm$ 1.4 |
| <i>L. amazonensis</i> | 0.025 $\pm$ 0.006  | 0.1 $\pm$ 0.1    | 4.0 $\pm$ 0.8  |
| <i>L. mexicana</i>    | 0.0033 $\pm$ 0.002 | 0.01 $\pm$ 0.005 | 1.2 $\pm$ 0.2  |
| <i>L. donovani</i>    | 0.081 $\pm$ 0.010  | 0.5 $\pm$ 0.2    | 5.0 $\pm$ 1.7  |

Promastigotes were inoculated at  $2.0 \times 10^5$  cells/ml in various concentrations of ITZ and culture densities were determined after 48 hours. IC25, IC50, and IC90 are ITZ concentrations that inhibit growth by 25%, 50%, and 90%, respectively, in comparison to control cultures (no ITZ). Experiments were performed three times (average $\pm$ SD).
