# Supplementary material for: Sterol Biosynthesis Is Required for Heat Resistance but Not Extracellular Survival in Leishmania
Source: PubMed Central journal article supplement (PMC4207814; doi:10.1371/journal.ppat.1004427), 2014-10-23
Supplement: ppat.1004427.s023.pdf [file ppat.1004427.s023.pdf]

**Table S3. List of oligonucleotides used in this study.**

| Primer # | Name                         | Sequence                                    |
|----------|------------------------------|---------------------------------------------|
| 170      | 5' ORF C-14 Demethylase      | GATCATagatctACCATGATCGGCGAGTTCTTCCT         |
| 171      | 3' ORF C-14 Demethylase      | GATCATagatctCTAAGCAGCCGCCTTCTTCC            |
| 172      | 5' 5' UTR C-14 Demethylase   | GATCATgaattcCGCCCGCGGATTTTCGTGAAG           |
| 173      | 3' 5' UTR C-14 Demethylase   | GTCAGCggatccGATCTAactagtGATGGCGAACCTTCTCGGC |
| 174      | 5' 3' UTR C-14 Demethylase   | GATCATggatccAGCGAGGACGCGGGCTGG              |
| 175      | 3' 3' UTR C-14 Demethylase   | GATCATaagcttGTGCAGCAACAGTCAGTTTT            |
| 176      | 5' Southern probe C-14 DM    | TAGTGCGACGGTGATTGCCG                        |
| 177      | 3' Southern probe C-14 DM    | GCTTGCCTGGGCGCTCGGGC                        |
| 178      | C-14 Demethylase Internal I  | CCGCGCCATAACCCGCGCATG                       |
| 179      | C-14 Demethylase Internal II | CGGCGGGTCACGGCGGATCG                        |
| 333      | c14dm ORF reverse+GFP        | GATCATagatctAGCAGCCGCCTTCTTCCTGA            |
| 7        | 5' ORF pXG Upstream          | CACTTTCAAGGCTTCCCGAAC                       |
| 8        | 3' ORF pXG Downstream        | CGCGAATTGAAGAACAGAGAAGC                     |
| 336      | seqing pxg-c14dm-GFP FOR     | CACCATCTACGCGTGCACATCATC                    |
| 337      | seqing pxg-c14dm-GFP REV     | ACGCCGTAGGTGAAGGTGGTC                       |

Sequences in lowercase represent restriction enzyme recognition sites.
